1 **Combined analysis of the time-resolved transcriptome and proteome of the**  
2 **pathogenicity-activated plant pathogen *Xanthomonas oryzae* pv. *oryzae***

3

4 Seunghwan Kim<sup>1</sup>, Wooyoung Eric Jang<sup>2</sup>, Min-Sik Kim<sup>2, 3§</sup>, Jeong-Gu Kim<sup>1§</sup>, Lin-Woo  
5 Kang<sup>4§</sup>

6

7 <sup>1</sup>Genomics Division, National Academy of Agricultural Sciences (NAAS), Rural  
8 Development Administration (RDA), Jeonju 54874, Republic of Korea; <sup>2</sup>Department of  
9 Applied Chemistry, Kyung Hee University, Yongin 17104, Republic of Korea; <sup>3</sup>Department  
10 of New Biology, DGIST, Daegu 42988, Republic of Korea; <sup>4</sup>Department of Biological  
11 Sciences, Konkuk University, 1 Hwayang dong, Gwangjin-gu, Seoul 05029, Republic of  
12 Korea

13

14

15 §Corresponding authors:

16 Dr. Lin-Woo Kang

17 Department of Biological Sciences, Konkuk University, Seoul 05029, Republic of Korea; Tel.

18 82-2-450-4090; Fax: 82-2-444-6707; E-mail: [lkang@konkuk.ac.kr](mailto:lkang@konkuk.ac.kr)

19

20 Dr. Jeong-Gu Kim

21 Genomics Division, National Academy of Agricultural Science (NAAS), Rural Development

22 Administration (RDA), Jeonju 54874, Republic of Korea; Tel. 82-63-238-4566; E-mail:

23 [jkim5aug@korea.kr](mailto:jkim5aug@korea.kr)

24

25 Dr. Min-Sik Kim, Department of New Biology, DGIST, Daegu 42988, Republic of Korea; E-

26 mail: [mkim@dgist.ac.kr](mailto:mkim@dgist.ac.kr)

27

28 Running title: analysis of transcriptome and proteome in P-activated Xoo

29

30 **Abstract**

31 *Xanthomonas oryzae* pv. *oryzae* (Xoo) is a plant pathogen responsible for causing bacterial  
32 blight in rice. It is responsible for blight outbreaks in most rice-producing countries and can  
33 reduce the rice yield by 50% due to the lack of an effective pesticide. The immediate  
34 alterations in Xoo upon initial contact with rice at the infection site are essential for  
35 pathogenesis. Here, we studied time-resolved gene expression in pathogenicity-activated Xoo  
36 cells at the transcriptome and proteome levels. The early response genes of Xoo include  
37 genes related to cell motility, inorganic ion transport, and effectors, which aid the Xoo cells to  
38 invade damaged rice leaf tissues, obtain scarce cofactors, and evade rice immune responses,  
39 respectively. Alteration of gene expression is initiated as early as few minutes after the initial  
40 interaction and changes with time. Although there was a correlation between the overall  
41 expression patterns of mRNAs and proteins for many genes, some genes also exhibited  
42 differences with respect to the expression timing and level of mRNAs and proteins,  
43 suggesting an important role of translational regulation in the early stages of pathogenesis.  
44 Gene expression analysis using time-resolved transcriptome and proteome data provided  
45 valuable information regarding Xoo pathogenesis during the initial stages of Xoo-rice  
46 interaction and revealed translational regulation of gene expression in bacteria.

47

48 **Keywords:** Xoo-rice interactions, proteome and transcriptome, time-resolved gene  
49 expression, *Xanthomonas oryzae* pv. *oryzae*, pathogenicity, translational regulation

50

## 51 **Introduction**

52 Rice (*Oryza sativa* L.) is the most widely consumed staple food, sustaining two-thirds of  
53 the world's population (Jackson, 2016). Bacterial blight of rice caused by *Xanthomonas*  
54 *oryzae* pv. *oryzae* (Xoo) is a devastating disease for which an effective pesticide has not been  
55 developed yet; it is known to cause severe yield losses of up to 50% in several rice-growing  
56 countries (Oliva et al., 2019). The demand for rice is expected to increase by at least 25% by  
57 2030, owing to the rapidly growing world population, environmental stress arising in  
58 response to climate change, and pathogen pressure (Li et al., 2014). Further, the Green  
59 Revolution has resulted in a shift in rice cultivation, from varied traditional landraces to  
60 limited high-yielding varieties, via artificial selection. This has resulted in the co-evolution of  
61 crop pathogens including Xoo with the selected host races in the modern agricultural  
62 ecosystem (Quibod et al., 2020).

63 The pathogen-host system of Xoo and rice serves as an ideal agricultural model to study  
64 crop diseases in a field setting at the molecular level; this is facilitated by the early  
65 elucidation of the whole genome structure of both Xoo and rice (Jackson, 2016; Lee et al.,  
66 2005). Xoo typically invades rice leaves through the wounds or hydathodes and replicates in  
67 the xylem vessels to cause disease (Mew et al., 1993). Rice contains a two-tiered innate  
68 immune system, consisting of pathogen-associated molecular pattern- and effector-triggered  
69 immunity, which protects against Xoo and initiates the hypersensitivity response at the  
70 infection site (Jones and Dangl, 2006). In Xoo-rice interactions, Xoo injects effectors into  
71 rice cells to modulate the cellular activities of the host to promote pathogenesis (Tsuge et al.,  
72 2014). The early interactions between Xoo and rice at the infection site determine the fate of  
73 infection, i.e., occurrence of disease or initiation of the immune response. The environmental  
74 conditions prevalent at the site of infection are varied and complex, and our understanding of

75 alterations in the Xoo cells in response to the initial interactions with rice is limited.

76 Transcription and translation are tightly coupled in bacteria and can occur simultaneously  
77 in the cytosol (Hershey et al., 2019). Although proteins are the final functional products of  
78 genes, the quantity of specific mRNA molecules often represents the expression level of a  
79 gene at a given time point with the well-established RNA sequencing (RNA-Seq) technology.  
80 In comparison, high resolution mass spectrometry-based quantitative proteomics is a more  
81 recent analytical technique, and still has a lower coverage of protein products, requires  
82 greater sample quantity, and is more expensive (Schubert et al., 2017).

83 We had previously developed an *in vitro* pathogenicity assay to recapitulate Xoo-rice  
84 interactions at the site of infection by treating Xoo cells with the rice homogenate (RLX), and  
85 assessed the time-resolved changes in the transcriptome (Kim et al., 2016; Kim et al., 2013;  
86 Kim et al., 2011). The *in vitro* pathogenicity assay provides high signal to noise data with  
87 Xoo cells synchronized with respect to the timing of pathogenicity activation. Transcriptome  
88 data from RNA-Seq experiments revealed that most virulence genes of Xoo were upregulated  
89 within an hour of the initial interaction with RLX, and these upregulated genes were related  
90 to bacterial motility, inorganic ion transport, hypersensitive response and pathogenicity (*hrp*),  
91 bacterial toxins and effectors of avirulence (*avr*), plant cell wall degradation, and  
92 extracellular polysaccharide synthesis and secretion (Kim et al., 2016).

93 Here, we expand the study of the gene expression in pathogenicity-activated (P-activated)  
94 Xoo from the transcriptome to the proteome and compare the time-resolved gene expression  
95 in terms of both mRNA and protein. The time-dependent expression of mRNAs and proteins  
96 and the kinetics of expression in response to the pathogenic signal allow the visualization of  
97 the immediate alterations in gene expression profiles in Xoo cells and reveal the timely  
98 regulation of bacterial translation.

99

## 100 **Results**

### 101 **Time-resolved proteome data**

102 We coupled LC-MS/MS with an *in vitro* assay system to obtain the time-resolved proteome  
103 data for P-activated Xoo cells (**Scheme 1**). The *in vitro* assay system recapitulated the initial  
104 interaction between Xoo cells and damaged rice leaf tissues at the site of infection; this was  
105 achieved by adding fresh RLX—prepared by grinding the leaves of a Xoo-susceptible rice  
106 cultivar (Milyang 23) in liquid nitrogen—to a Xoo cell culture in the mid-exponential phase.  
107 Samples for proteome analysis were collected from RLX-treated (P-activated) and untreated  
108 (control) Xoo cells at 0, 30, 60, 90, and 120 min after RLX treatment (**Table S1**).

109 Analysis on UniProt revealed that the total 4,733 predicted open reading frames in the Xoo  
110 genome corresponded to 4,382 proteins in the proteome, of which 2,589 proteins (59%) were  
111 identified for at least one time point and 2,296 proteins (52%) were detected in both  
112 replicates (**Figure S1A**). Median sequence coverages for total identified proteins was 23%  
113 and 24% for each of the independent duplicate experiments (**Figure S1B**). A total of 20,963  
114 and 19,684 non-redundant peptides were identified in both replicates, with 47,025 and 41,428  
115 peptide-spectrum matches, respectively (**Figure S1C**).

116 Protein abundance values obtained after quantile-normalization (**Figure S2A**) were used for  
117 pairwise comparisons; the Pearson's correlation coefficients corresponding to the abundance  
118 values showed close correlations (0.98-0.99), indicating comparable cellular concentration of  
119 most proteins (**Figure S2B**). The smallest correlations were observed for the RLX-treated  
120 samples at 30 min, indicating greater changes in the proteome during the initial 30 min; this  
121 was consistent with the transcriptome data. We further performed a principal component  
122 analysis to determine the relationships between the assessed samples. **Figure S2C** shows that  
123 the P-activated sample at 0 min clustered closely with all control samples, whereas the P-

124 activated samples at other time points were more spread out. The proteome of the P-activated  
125 Xoo cells at 30 min was considerably different from that of P-activated Xoo at other time  
126 points; this was consistent with the results of the pairwise multi-scatter plot (Figure S2B).

127 Time-supervised hierarchical clustering was performed to determine temporal and  
128 synchronized changes in protein abundance. Two distinct synchronized patterns—one  
129 decreasing and the other increasing in response to RLX treatment—were observed (Figure 1).  
130 The two lists including proteins exhibiting the two patterns were used for STRING analysis,  
131 which produced two interaction networks (Figure S3A-B). Several genes related to cell  
132 motility, inorganic ion transport, and transcriptional regulators were immediately responsive  
133 to the pathogenicity signal (Table S2); these have been described in detail in the discussion  
134 section.

135

### 136 **Up and down regulated proteins**

137 Quantitative proteome data obtained from P-activated and control Xoo cells at every 30  
138 min allowed the visualization of the three-dimensional protein expression data in terms of the  
139 genes, time intervals, and expression levels (Figure 1 and Table S3). For all the open reading  
140 frames, approximately 93 (2.0%), 213 (4.5%), and 468 (9.9%) proteins were upregulated by  
141 more than 200% (2-fold), 50%, and 20% at 30 min, respectively, and approximately 7 (0.1%),  
142 93 (2.0%), and 561 (11.9%) proteins were downregulated to less than 25% (2-fold), 50%, and  
143 80% at 30 min, respectively (Table S4). Comparable numbers of proteins were up- and  
144 downregulated from 30 to 120 min.

145 In case of the duration of protein expression in P-activated Xoo, 8 (0.2%), 32 (0.7%), and  
146 75 (1.6%) proteins were upregulated for 120 min by more than 200% (2-fold), 50%, and 20%,  
147 respectively and 0 (0%), 1 (0.02%), and 87 (1.8%) proteins were downregulated for 120 min

148 to less than 25% (2-fold), 50%, and 80% , respectively (**Table S5**), indicating that most  
149 proteins were temporarily up- or downregulated in the *in vitro* assay.

150 The proteins expressed at 30 min presented the highest change within 120 min. More than  
151 90 proteins (1.9%) were upregulated by more than 2-fold at 30 min in each dataset, whereas  
152 27 proteins were upregulated in both datasets from the duplicate experiments (**Table S6**).  
153 Almost half of the 27 upregulated proteins were related to cell motility and ion uptake, seven  
154 were related to chemotaxis and motility, and five were related to transporters and pumps. In  
155 the proteome datasets at 30 min, 95 proteins were downregulated by more than 50%, 17  
156 proteins were downregulated in both datasets (**Table S7**), including transcription-related  
157 proteins—such as sigma-54 modulation protein and MetE/MetH family transcriptional  
158 regulator—and cell division- and cell cycle-related proteins.

159

#### 160 **Proteome and Clusters of Orthologous Groups (COGs)**

161 To study the global gene expression pattern based on gene function, we superimposed  
162 time-dependent protein expression levels as per the functional categories in the Clusters of  
163 Orthologous Groups (COG) database (**Figure 2**), which were grouped into three classes (red,  
164 yellow, and blue) depending on the observed pattern. To facilitate the comparison of time-  
165 dependent protein expression levels, the expression level at 0 min was set as the reference  
166 level (=1) for each gene, and the fold change in the protein expression level was calculated at  
167 each time point, as in case of the RNA-Seq data analysis (Kim et al., 2016).

168 The most prominent changes in protein expression in Xoo cells were observed for proteins  
169 associated with cell motility (N) and inorganic ion transport and metabolism (P), which were  
170 placed in the red class. In category N, two major expression peaks, indicating >2-fold up-  
171 regulation, were detected at 30 and 90 min. In category P, upregulated proteins peaked at



172 around 30 min. Proteins grouped in the yellow class exhibited moderate changes in their  
173 expression level, and were divided into nine functional categories, including signal  
174 transduction (T), intracellular trafficking, secretion, and vesicular transport (U), energy  
175 production and conversion (C), transcription (K), and cell wall/membrane/envelop biogenesis  
176 (O). The blue class included proteins associated with other nine categories, the expression  
177 levels of which exhibited little or no change when compared with those at 0 min, albeit  
178 except for a few proteins.

179

### 180 **Comparison of mRNA and protein levels**

181 We compared mRNA and protein levels of each gene in the transcriptome and proteome  
182 (Figure 3; thin dashed red lines and solid and dashed thick black lines, respectively). Both  
183 transcriptome and proteome data were obtained for up to 2 h (120 min) after RLX treatment.  
184 The experimental procedure used to prepare protein samples for LS-MS/MS required at least  
185 30 min, whereas that for mRNA samples required at least 5 min; the time interval for the  
186 proteome data was set to 30 min, whereas that for transcriptome data was set to 5-30 min.  
187 Due to the different sampling times, the transcriptome data included mRNA levels at  
188 additional time points of 5, 10, 15, and 45 min, whereas the proteome data did not include  
189 protein levels before 30 min, in which case the protein levels (dashed black lines) were  
190 extrapolated based on the protein levels at other time points using non-linear regression.

191

### 192 *Flagella and chemotaxis-related genes*

193 Flagella and chemotaxis-related genes encode more than 40 proteins, including structural  
194 components and assembly factors of flagellar hook-basal body and filament and chemotaxis  
195 proteins (Mukherjee and Kearns, 2014). Two dominant hierarchical clusters, with distinct

196 synchronized patterns of increasing and decreasing proteome concentration (indicated by red  
197 and blue, respectively), were identified (Figure 1). The red (359 proteins) and blue (391  
198 proteins) clusters included 21 (53%) of the 40 genes related to the flagellar assembly pathway,  
199 of which 20 genes were included in the red cluster and the remaining gene was included in  
200 the blue cluster (Table S2).

201 We grouped the flagella and chemotaxis-related genes into three gene clusters, i.e., groups  
202 I-A, I-B, and II, based on their positions in the genome (Figure 4A). Genes in cluster I-A and  
203 I-B were associated with flagellar machinery, such as flagellar basal body hook and type III  
204 secretion system (T3SS), whereas cluster II included chemotaxis-related genes.

205 Superimposition of transcriptome and proteome data revealed clearly superimposed peaks  
206 of the main upregulated genes in both data at 30 min (Figure 3A). The transcriptome data  
207 revealed that most flagella and chemotaxis-related genes were regulated in a similar pattern,  
208 i.e., genes in clusters I-A, I-B, and II were downregulated at 5 min and upregulated at 30 min.  
209 However, the proteome data presented a different expression pattern. Proteins in clusters I-A  
210 and I-B were upregulated at 30 min, consistent with the transcriptome data. However,  
211 proteins in cluster II were upregulated at 90 min, exhibiting a delay of 1 h when compared  
212 with the transcriptome data (Figure S4).

213

#### 214 *Inorganic ion transport and metabolism genes*

215 Iron uptake genes play a key role in pathogenicity during the early stages of host-pathogen  
216 interactions (Garau et al., 2004). TonB-dependent receptors (TBDRs) are bacterial outer  
217 membrane proteins that bind and transport ferric chelates of siderophores. Several annotated  
218 TBDR genes have been identified in the Xoo KACC10331 genome, including *IroN*, *FyuA*,  
219 *FecA*, *BtuB*, *FhuA*, *CirA*, and *FepA* (Kim et al., 2016). Of these, *FecA* (*Xoo0901*) and *CirA*

220 (*Xoo3793*) were upregulated and *IroN* genes (*Xoo0394* and *Xoo1784*) were downregulated in  
221 the transcriptome as well as in the proteome data. In the proteome data, *FecA* (*Xoo0901*) and  
222 *CirA* (*Xoo3793*) upregulation peaked at 30 min (Figure 5A). *IroN* genes that were  
223 downregulated at the transcript level were also downregulated—or expressed at the same  
224 level—at the protein level (Figure 5B). The expression levels of other paralogs of *FecA* and  
225 *CirA* genes were comparable with those in the control in the transcriptome as well as the  
226 proteome data (Figure S5), indicating that these genes respond to different pathogenic  
227 signals—which were missing in the *in vitro* system—or are pseudogenes.

228 Phosphate uptake genes, i.e., *OprO*, *PhoX*, *PstSCAB*, and *PhoU*, were upregulated in the  
229 transcriptome (up to 16-fold) at 5-10 min. The proteome data of *OprO*, *PhoX*, *PstSCAB*, and  
230 *PhoU* revealed 2-3-fold upregulation at 30 min (Figure S6).

231

### 232 *Expression and secretion of effectors*

233 In *Xanthomonas oryzae* pv. *oryzicola*, *AvrBs2* suppresses host immunity and promotes  
234 disease development (Ullah et al., 1998). In *Xanthomonas campestris* pv. *Vesicatoria*, the role  
235 of *AvrBs3* is that of a transcription activator-like (TAL) effector that activates the expression  
236 of plant immunity genes (Kay et al., 2009). The secretion of effectors *XoAvrBs2*  
237 (*Xoo0168*)—a *Xoo* ortholog of *AvrBs2*—and *XoAvrBs3* (*Xoo2276*)—a *Xoo* ortholog of  
238 *AvrBs3*—through T3SS was confirmed upon interaction with RLX (Kim et al., 2013; Kim et  
239 al., 2011). In addition to the transcriptome and proteome, the expression and secretion of  
240 effectors were assessed using dot blots of *Xoo* cells transformed with the TAP-tagged effector  
241 genes (Figure 6). The expression levels of these factors in the transcriptome and proteome are  
242 indicative of their levels within *Xoo* cells. Dot blots provide information regarding the  
243 secreted levels in addition to the cellular levels.

244 The expression of *XoAvrBs2* transcript was upregulated from 5-30 min, while that of the  
245 *XoAvrBs2* protein was upregulated at 30 min, as is evident from the transcriptome and  
246 proteome data. In the dot blots, the levels of TAP-tagged *XoAvrBs2* were upregulated by 4-  
247 fold at 5 min and the secretion of *XoAvrBs2* was detected as early as 15 min. The expression  
248 of *XoAvrBs3* transcript was upregulated and peaked from 5-30 min, whereas that of  
249 *XoAvrBs3* protein was maintained at almost the same—or slightly lower levels—at 60 min.  
250 Dot blots revealed the secretion of *XoAvrBs3* from 15 min.  
251

## 252 **Discussion**

253 Plant pathogens can exhibit complex responses to the initial interactions with the host  
254 under varying biotic and abiotic conditions at the site of infection. The immediate response of  
255 the plant pathogen under any condition is important for successful infection. In the present  
256 study, we analyzed the initial time-dependent responses of Xoo cells in terms of gene  
257 expression at both the mRNA and protein levels using an *in vitro* assay system, wherein RLX  
258 mimicked the damaged rice leaf tissue. RLX treatment of Xoo culture serves as a baseline for  
259 setting the timing of initial interaction between Xoo and RLX; this allows us to study the  
260 time-resolved gene expression responses of Xoo cells, with a high signal to noise ratio  
261 compared to that of *in vivo* assay systems.

262 Of all the predicted open reading frames in Xoo, we quantified approximately 86% and 49%  
263 of the mRNAs and proteins, respectively, in a time-dependent manner. A good  
264 correspondence was observed between the mRNA and protein expression of genes. The  
265 expression pattern was more synchronized for genes closely located in the genome, (**Figure 4**  
266 **and S4**); this could be attributed to the polycistronic gene structure in bacteria. With respect  
267 to the rapidity of pathogenic gene expression in response to the signals triggered upon  
268 interaction with the host, both transcription and translational machineries responded  
269 immediately to the interaction, at the earliest assessed time points of 5 and 30 min, and this  
270 was reflected in the transcriptome and proteome data (15 min in dot blots). Both mRNAs and  
271 proteins presented the greatest variation in their levels during the initial 30 min.

272 The Xoo genes exhibiting the most rapid responses to the initial interaction with RLX,  
273 included genes associated with cell motility and inorganic ion uptake, and genes coding for  
274 effector molecules. All these three functional categories of genes are closely related to the  
275 early stages of pathogenesis. The genes associated with cell motility could be responsible for

276 the migration and accumulation of the Xoo cells at the site of infection via the damaged  
277 xylem tissues or exposed hydathodes in rice. As inorganic ions, such as iron and phosphate  
278 ions, function as essential cofactors in all living organisms, bacterial pathogens and host rice  
279 cells compete to obtain and secure the limited resources available. Effector molecules are  
280 more directly related to pathogenesis and are injected by the Xoo into the rice cells via pili-  
281 like T3SS; these molecules modulate the immune system of rice.

282 The earliest available time-point for comparing the gene expressions in terms of mRNA  
283 and protein levels was 30 min after the RLX treatment. At 30 min, 290 mRNAs were  
284 upregulated by more than 2-fold in the transcriptome, compared with 93 proteins in the  
285 proteome (Table S4), and the average fold change in the expression of the upregulated genes  
286 in the transcriptome and proteome was similar, i.e., 3.28- and 3.40-fold, respectively (Table  
287 S6). The number of upregulated transcripts is much higher than—even though we figure into  
288 our calculations the higher coverage of quantified genes in transcriptome than in proteome—  
289 that of the proteins at 30 min, which indicates that not all the upregulated mRNAs are  
290 simultaneously translated to proteins.

291 The difference in the gene expression in terms of the mRNA and protein levels at a given  
292 time point suggests the existence of an additional translational regulation step—after  
293 transcription—although transcription and translation can occur simultaneously in bacteria.  
294 For some genes, the mRNA and protein expression peaks were observed at varying time  
295 points. Bacterial pathogenesis appears to involve a fine-tuning mechanism after transcription,  
296 which could help adjust the expression of the early-responsive genes under varying biotic and  
297 abiotic environmental conditions.

298 Genes related to flagella and cell motility are clustered in the bacterial genome. In Xoo,  
299 three clusters are observed, i.e., I-A, I-B, and II. On superimposing the mRNA and protein

300 levels in time, the expression of mRNAs and proteins peaked at 30 mins for genes in cluster I,  
301 the expression of mRNAs and proteins peaked at 30 and 90 min, respectively, for genes in  
302 cluster II. A translational regulation step might be involved that determines the time for the  
303 translation of specific mRNAs—coded by flagella and cell motility-related genes—into  
304 proteins depending on the priority of each gene.

305 The hierarchy of the expression of flagella and cell motility-related genes has been  
306 extensively studied in the transcriptome of *E. coli*, where sigma and anti-sigma factors are  
307 known to be the key transcriptional regulators (Mukherjee and Kearns, 2014). The overall  
308 organization of flagella and chemotaxis-related genes is different between *E. coli* and Xoo  
309 (Figure S7). In Xoo, the cluster of *fliE-R* genes (cluster I-B) is positioned just downstream to  
310 the *flgB-L* genes (cluster I-A), whereas in *E. coli*, chemotaxis genes are present between the  
311 two. *flhDC* genes do not have any orthologs in Xoo, and a different transcriptional regulator,  
312 i.e., the *fleQ* gene, is present. Based on the nomenclature used in *E. coli*, several Xoo genes  
313 classified as Class III genes are located at different positions and their expression regulation  
314 is also different. In Xoo, ribosomes or other translation factors might recognize certain  
315 unknown priority signals in mRNA transcripts during pathogenesis.

316 The immediate upregulation of inorganic ion uptake genes, especially iron uptake genes,  
317 may aid Xoo cells to obtain the essential cofactor ions, when they are competition with the  
318 host cells for nutrition. The iron ion is essential for photosynthesis and respiration and is  
319 needed by the redox enzymes; it is an important signaling molecule for pathogenicity.  
320 Pathogens commonly use iron chelating molecules or siderophores to derive this scarce  
321 inorganic cofactor from the hosts. The leakage of iron ions from damaged leaf tissues might  
322 serve as an important signal of infection and might provide an opportunity to secure essential  
323 iron ions for the Xoo cells.

324 In comparison with the flagella and cell motility-related genes that are closely clustered in  
325 the genome and exhibit coordinated expression levels, the ion uptake genes are dispersed  
326 across the genome and are independently expressed (Figure S8). The separation of these  
327 genes facilitates independent regulation. In comparison with the flagella and motility-related  
328 genes, the inorganic ion uptake genes exhibited great variation in the mRNA levels but  
329 similar protein expression levels (Figure 3).

330 Effectors are key molecules for pathogenicity that modulate the host immune responses  
331 after infection. The protein expression and secretion of the Xoo effectors XoAvrBs2 and  
332 XoAvrBs3 were assessed using dot blots, which enabled the monitoring of effector proteins at  
333 the early stages of the initial interaction, i.e., within 30 min of RLX treatment. The secretion  
334 of effectors was observed from 15 min after application of the pathogenic stimulus. In the P-  
335 activated proteome data, the expression of effector proteins was maintained at a similar level  
336 to that at 0 min; this may be attributed to the similar protein synthesis and secretion rates.

337 The effector genes are also dispersed across the genome, like the ion uptake genes (Figure  
338 S9). Interestingly, transposase genes are located close to the effector genes; these may aid the  
339 effector genes to transpose through the bacterial genome and plasmids. The expression of  
340 XoAvrBs2 was upregulated 5 min after RLX treatment, and its secretion was detected in the  
341 culture medium at 15 min. Although the cellular protein level was upregulated by  
342 approximately 20% in the proteome at 30 min, the dot blot showed an upregulation of 4-fold  
343 at 5 min. The secreted XoAvrBs2 exhibited a 16-fold increase at 120 min. In case of  
344 XoAvrBs3, the cellular protein level decreased by approximately 20% in the proteome at 60  
345 min, whereas the dot blot revealed a 16-fold increase in XoAvrBs3 secretion at 120 min.  
346 However, one should take into consideration the fact that the experimental procedures for the  
347 dot blots and proteome analysis are different. For the dot blots, TAP-tagged XoAvrBs2 and



348 *XoAvrBs3* genes were introduced into *Xoo* cells via a plasmid and TAP-tagged *XoAvrBs2*  
349 and *XoAvrBs3* proteins were quantitatively measured. In proteome analysis, *XoAvrBs2* and  
350 *XoAvrBs3* proteins were expressed from the endogenous *XoAvrBs2* and *XoAvrBs3* genes in  
351 the *Xoo* genome.

352 Gene expression involves sequential transcription and translation. In bacteria, with respect  
353 to post-transcriptional and post-translational modification, mRNAs without a cap at 5' end  
354 and a poly A tail at 3' end have a short half-life—as short as few minutes—and proteins  
355 undergo only limited post-translational modifications. The limited post-translational  
356 modifications in bacterial proteins imposes a pressure on a nascent protein from the ribosome  
357 to take a functional form immediately. The present study revealed that genes related to cell  
358 motility and inorganic ion uptake, and genes coding for effector molecules of *Xoo* are the  
359 first to respond to the initial interactions with RLX, and play an essential role in the following  
360 processes: (1) invasion of the *Xoo* cells into the damaged rice leaf tissues, (2) securing the  
361 limited cofactors, and (3) modulating the immune responses of the host to favor pathogenesis.  
362 This combined analysis of the time-resolved transcriptome and proteome of *Xoo* during the  
363 initial interaction with rice tissues provides valuable insights into the pathogenic mechanism  
364 of *Xoo*.

365

## 366 **Materials and Methods**

### 367 **Bacterial strain and culture conditions**

368 *Xanthomonas oryzae* pv. *oryzae* (Xoo) strain KACC10331, consisting of 4,941,439  
369 nucleotides and 4,733 open reading frames, without any apparent autonomous plasmids, was  
370 obtained from the Korean Agricultural Collection Center (KACC) (Lee et al., 2005). The  
371 bacteria were cultured in nutrient broth (Difco, Detroit, MI, USA) or Yeast Glucose Cm Agar  
372 (YGC) (2.0% D-(+)-glucose, 2.0% CaCO<sub>3</sub>, 1.0% yeast extract, and 1.5% agar) at 28°C.

373

### 374 **Construction of expression vector and transformation of Xoo**

375 The effector genes *XoAvrBs2* (*Xoo0168*) and *XoAvrBs3*—including the promoter region  
376 (from -149 and -750 bp to the start codon of the respective gene)—were amplified by PCR,  
377 and ligated into the pGEM®-T Easy Vector (Promega). The cloned sequences were verified  
378 and then digested with *KpnI* and *SacI*, and the products were ligated into the pHM1-XTAP-  
379 T<sub>gap</sub> vector. The recombinant vectors were purified and introduced into Xoo strain  
380 KACC10331 by electroporation, using Gene Pulser II (Bio-Rad, Hercules, CA) with a 0.2  
381 cm-gap cuvette at 2.5 kV cm<sup>-1</sup>. Xoo cells were then diluted immediately with 1 mL Super  
382 Optimal Broth (SOC) medium and incubated at 28°C with agitation for 2 h. Cells were then  
383 recovered from the culture medium and plated on nutrient broth agar plates containing 50 µL  
384 mL<sup>-1</sup> spectinomycin and incubated at 28°C for 4 d.

385 The transformants were cultured in 100 mL of nutrient broth up to the mid-exponential  
386 phase ( $A_{600} = 0.5$ ). Cells were harvested by centrifuging 1 mL of the cell culture at 12,000  
387 rpm and 4°C for 5 min. Harvested cells were washed once with phosphate-buffered saline  
388 (PBS) at pH 7.2, resuspended in 200 µL PBS, and then sonicated. Protein samples were  
389 serially diluted using 2 M urea or PBS in 96-well plates and then transferred to a

390 polyvinylidene difluoride membrane (PVDF; 0.2  $\mu\text{m}$ , Bio-Rad) using a 96-well vacuum dot-  
391 blotter (Bio-Rad). The membrane was then washed thrice with PBS, blocked with 5% skim  
392 milk for 30 min, and subjected to a one-step immuno-affinity reaction using the rabbit  
393 peroxidase-anti-peroxidase soluble complex antibody (Sigma-Aldrich, St. Louis, USA). The  
394 membrane was developed, and bound antibodies were detected by chemiluminescence.

395

### 396 **Treatment of rice leaf extract for proteome analysis**

397 *Oryza sativa* L. cv. Milyang 23, a Xoo-susceptible rice cultivar, was used for performing  
398 proteome analysis. Rice plants were grown in a paddy field at Jeonju in South Korea  
399 (35°49'52.0"N 127°03'55.6"E) until panicle initiation (approximately 8 to 9 weeks). Forty  
400 clumped rice leaves were harvested and homogenized with liquid nitrogen using a mortar and  
401 pestle. One-gram aliquots of the resulting homogenate (RLX) were transferred to Eppendorf  
402 tubes and stored at -80°C. Xoo was cultured (100 mL) in nutrient broth up to the mid-  
403 exponential phase ( $A_{600} = 0.5$ ) in a shaking incubator at 28°C and 200 rpm, and RLX (2 g)  
404 was then added to the culture medium. The culture (100 mL) was subjected to sequential  
405 filtration through a gauze, 40- $\mu\text{m}$  nylon cell strainer (FALON, New York, USA), and 5- $\mu\text{m}$   
406 syringe filter (Sartorius, Germany) to remove RLX (0, 30, 60, 90, and 120 min after RLX  
407 addition). The filtered culture (100 mL) was centrifuged at 10,000  $\times g$  and 4°C for 10 min.  
408 Duplicate samples were obtained for each time point from two independent experiments.

409

### 410 **Sample preparation for proteome analysis**

411 The harvested samples were lysed in a lysis buffer (9 M urea prepared in 20 mM HEPES (pH  
412 7.5), supplemented with protease inhibitor cocktail (Complete mini, Roche) and phosphatase  
413 inhibitor (PhosSTOP, Sigma-Aldrich)) and sonicated on ice. The exact amount of proteins in

414 each sample was determined using the bicinchoninic acid assay. Protein integrity was  
415 confirmed by SDS-PAGE and 200 µg of protein from each sample was used for analysis. The  
416 disulfide bonds were reduced by treatment with 10 mM dithiothreitol for 1 h, and incubation  
417 with 30 mM iodoacetamide (30 min in the dark) was performed to alkylate free sulfhydryl  
418 functional groups. Samples were diluted with triethylammonium bicarbonate buffer (pH 8.0)  
419 in a manner such that the final urea concentration was 1.5 M. Proteins were digested using  
420 MS grade trypsin (Thermo Fisher Scientific) at a protein to enzyme ratio of 50:1 for 12 h at  
421 37°C. The reaction was quenched by lowering the sample pH (<3) using trifluoroacetic acid.  
422 The obtained peptides were desalted using a C18 spin column (Harvard) to remove salts and  
423 other contaminants, and the purified peptides were dried. Then, they were isotopically labeled  
424 using the 10-plex tandem mass tag (TMT, Thermo Fisher Scientific), as per the  
425 manufacturer's protocol. The reaction was allowed to continue for 2 h at room temperature  
426 and TMT-labeled samples were subsequently dried in a SpeedVac concentrator. Chemical  
427 labeling with TMT was confirmed by liquid chromatography-tandem mass spectrometry (LC-  
428 MS/MS), and the samples were pooled and fractionated using a basic reverse phase liquid  
429 chromatography (RPLC) system. The pooled TMT-labeled peptide mixture was resuspended  
430 in 10 mM ammonium formate and fractionated into 12 fractions using a C18 column (C<sub>18</sub>, 5  
431 µm pore size, 4.6 mm × 250 mm, XBridge, Waters). The fractionated peptides were dried and  
432 stored at -80°C until LC-MS/MS analysis.

433

#### 434 **LC-MS/MS and database search**

435 Each fractionated peptide sample was analyzed using an Orbitrap Fusion™ Lumos™  
436 Tribrid™ Mass Spectrometer coupled with the Easy-nLC 1200 nano-flow liquid  
437 chromatography system (Thermo Fisher Scientific). The dried peptides were reconstituted

438 using 0.1% formic acid and loaded on a C18 trap column. Peptides were resolved using a  
439 linear gradient solvent B (0.1% formic acid in 95% acetonitrile) and analyzed by high  
440 resolution mass spectrometry in the data-dependent acquisition mode. MS1 and MS2 were  
441 acquired for the precursor and the peptide fragmentation ions, respectively. MS1 scans were  
442 measured at a resolution of 120,000 and an  $m/z$  of 200. MS2 scans were acquired following  
443 the fragmentation of precursor ions by high-energy collisional dissociation (HCD) and were  
444 detected at a mass resolution of 50,000 and an  $m/z$  of 200. Dynamic exclusion was used to  
445 reduce redundant fragmentation of the same ions. The obtained mass spectrometry data were  
446 analyzed using the MaxQuant software (Tyanova et al., 2016a). Raw MS data were searched  
447 against the Xoo proteome in UniProt database. Carbamidomethylation of cysteine and 10-  
448 plex TMT modification of lysine and N-terminals were set as static modifications, whereas  
449 oxidation of methionine was set as a variable modification. False discovery rates at the levels  
450 of protein and peptide-spectrum matches were set at 0.01. The raw MS data and MaxQuant  
451 search results have been submitted to ProteomeXchange (project accession: PXD020135,  
452 reviewer access with username: [reviewer34070@ebi.ac.uk](mailto:reviewer34070@ebi.ac.uk) and password: mzn76I1O).

453

#### 454 **Proteomic data analysis**

455 The contaminant and reverse identified proteins were removed from the MaxQuant data.  
456 Proteins identified in both replicates were pooled for quantile normalization. The normalized  
457 values for the replicates were subjected to supervised hierarchical clustering and principal  
458 component analysis, using Perseus (Tyanova et al., 2016b), and the results were depicted in  
459 the form of a multi-scatter plot.

460

#### 461 **STRING map analysis**

462 The list of proteins in the selected patterns from the hierarchical clusters was uploaded on the  
463 STRING database (<https://string-db.org/>) to analyze the protein interaction maps. The clusters  
464 of proteins in the blue and red classes, which show the similar time-resolved expression  
465 patterns, were analyzed, and the list including the gene names with the selected organism was  
466 inputted in the multiple proteins search setting. The number of nodes and edges were  
467 automatically calculated based on Xoo genes with a PPI enrichment p-value of 20.9E-10.  
468 Figures were downloaded in the PNG file format for visualization.

469

#### 470 **RNA-Seq and data analysis**

471 In addition to the previously obtained RNA-Seq data for P-activated Xoo cells, RNA-Seq  
472 data at 90 and 120 min were obtained to correspond with the proteome data at these time  
473 points. RNA-Seq and data analysis were performed as previously described (Kim et al., 2016).  
474 Briefly, total RNA from samples was used to generate sequencing libraries, from which  
475 ribosomal RNA was removed using MICROBExpress Bacterial mRNA Enrichment Kit  
476 (Ambion, Austin, TX, USA), and enriched mRNA was prepared using Illumina TruSeq RNA  
477 Sample Preparation Kit (Illumina, San Diego, CA, USA). The RNA obtained after  
478 fragmentation was used to generate cDNA fragments, which were sequenced using Illumina  
479 Genome Analyzer Iix and mapped to the reference genome sequence  
480 (<http://www.ncbi.nlm.nih.gov/nuccore/58579623?report=fasta>) using CLC Genomics  
481 Workbench 4.0 (CLC bio, Aarhus, Denmark). Relative transcript abundance was calculated  
482 based on the number of reads per kilobase per million mapped sequence reads (RPKM).

483

#### 484 **Analysis of time-resolved continuous mRNA and protein expression**

485 The RPKM values of the mRNAs in the transcriptome and TMT intensities of the proteins

486 in the proteome corresponded to the observed expression level of each gene at a given time  
487 point. To facilitate the comparison of gene expression levels, the observed expression level at  
488 each time point was converted to fold change in gene expression, by dividing the expression  
489 level at a given time point by the initial expression level (0 min) of the same gene. The fold  
490 change in the time-resolved expression levels of a given gene during the two hours following  
491 the RLX treatment was fitted to a curve and analyzed using non-linear regression by  
492 GraphPad Prism (version 3.02 for Windows, GraphPad Software, San Diego California USA,  
493 [www.graphpad.com](http://www.graphpad.com)), and the continuous time-dependent changes in the mRNA and protein  
494 expression levels were determined using the fitted curve.

495

#### 496 **Analysis of the correspondence between mRNA and protein expression levels**

497 For the accurate comparison of the mRNA and protein expression levels in P-activated  
498 Xoo cells, the expression levels were corrected by comparing with those in the control cells at  
499 each time point. The fold change in mRNA and protein expression in P-activated Xoo cells at  
500 a given time point was divided by that of the control cells at the same time point. For  
501 analyzing the correspondence between the mRNA and protein levels of each gene in the  
502 transcriptome and proteome, the resulting control-corrected fold change values of mRNAs  
503 were compared with those of the proteins for a given time point as the gene expression level  
504 of mRNAs and proteins.

505

506 **Declarations**

507

508 **Compliance with ethics guidelines**

509 Seunghwan Kim, Wooyoung Eric Jang, Min-Sik Kim, Jeong-Gu Kim, and Lin-Woo Kang  
510 declare that they have no conflict of interest. The authors declare no competing financial  
511 interests. This article does not contain any studies with human or animal subjects performed  
512 by the any of the authors.

513

514 **Available data and material**

515 The raw MS data and MaxQuant search results are available at ProteomeXchange (Project  
516 accession: PXD020135, Reviewer access with username: [reviewer34070@ebi.ac.uk](mailto:reviewer34070@ebi.ac.uk)  
517 and password: mzn76I1O)

518

519 **Funding**

520 This work was undertaken in association with the Cooperative Research Program for  
521 Agriculture Science & Technology Development (Project No. PJ01327002020), Rural  
522 Development Administration, Republic of Korea.

523

524 **Author Contributions**

525 Investigation, Seunghwan Kim, Wooyoung Eric Jang, Min-Sik Kim, Jeong-Gu Kim, and  
526 Lin-Woo Kang; writing, Seunghwan Kim, Wooyoung Eric Jang, Min-Sik Kim, Jeong-Gu  
527 Kim, and Lin-Woo Kang; methodology, Seunghwan Kim, Wooyoung Eric Jang, Min-Sik  
528 Kim, Jeong-Gu Kim, and Lin-Woo Kang; funding acquisition, Jeong-Gu Kim, and Lin-Woo  
529 Kang; supervision, Min-Sik Kim, Jeong-Gu Kim, and Lin-Woo Kang. All authors have read



530 and agreed to the published version of the manuscript.

531

### 532 **Acknowledgments**

533 We are grateful to the staff members of the Cooperative Research Program for Agriculture  
534 Science & Technology Development (Project No. PJ01327002020), Rural Development  
535 Administration,

536

### 537 **Abbreviations**

538 Xoo, *Xanthomonas oryzae* pv. *oryzae*; RLX, rice leaf homogenate; KACC, Korean  
539 Agricultural Collection Center; P-activated, Pathogenicity-activated; LC-MS/MS, liquid  
540 chromatography-tandem mass spectrometry; COG, Clusters of Orthologous Groups; RPKM,  
541 Reads per kilobase per million mapped reads

542

543

544 **References**

545

546 Garau, G., Garcia-Saez, I., Bebrone, C., Anne, C., Mercuri, P., Galleni, M., Frere, J.M., and  
547 Dideberg, O. (2004). Update of the standard numbering scheme for class B beta-lactamases.  
548 *Antimicrobial agents and chemotherapy* 48, 2347-2349.

549 Hershey, J.W.B., Sonenberg, N., and Mathews, M.B. (2019). *Principles of Translational*  
550 *Control*. Cold Spring Harbor perspectives in biology 11.

551 Jackson, S.A. (2016). Rice: The First Crop Genome. *Rice* 9, 14.

552 Jones, J.D., and Dangl, J.L. (2006). The plant immune system. *Nature* 444, 323-329.

553 Kay, S., Hahn, S., Marois, E., Wieduwild, R., and Bonas, U. (2009). Detailed analysis of the  
554 DNA recognition motifs of the *Xanthomonas* type III effectors AvrBs3 and  
555 AvrBs3Deltarep16. *Plant J* 59, 859-871.

556 Kim, S., Cho, Y.J., Song, E.S., Lee, S.H., Kim, J.G., and Kang, L.W. (2016). Time-resolved  
557 pathogenic gene expression analysis of the plant pathogen *Xanthomonas oryzae* pv. *oryzae*.  
558 *BMC genomics* 17, 345.

559 Kim, S., Nguyen, T.D., Lee, J., Hong, M.K., Pham, T.V., Ahn, Y.J., Lee, B.M., Han, Y.S., Kim,  
560 D.E., Kim, J.G., *et al.* (2013). Homologous expression and T3SS-dependent secretion of  
561 TAP-tagged Xo2276 in *Xanthomonas oryzae* pv. *oryzae* induced by rice leaf extract and its  
562 direct in vitro recognition of putative target DNA sequence. *Journal of microbiology and*  
563 *biotechnology* 23, 22-28.

564 Kim, S.H., Lee, S.E., Hong, M.K., Song, N.H., Yoon, B., Viet, P., Ahn, Y.J., Lee, B.M., Jung,  
565 J.W., Kim, K.P., *et al.* (2011). Homologous expression and quantitative analysis of T3SS-  
566 dependent secretion of TAP-tagged XoAvrBs2 in *Xanthomonas oryzae* pv. *oryzae* induced by  
567 rice leaf extract. *Journal of microbiology and biotechnology* 21, 679-685.

568 Lee, B.M., Park, Y.J., Park, D.S., Kang, H.W., Kim, J.G., Song, E.S., Park, I.C., Yoon, U.H.,  
569 Hahn, J.H., Koo, B.S., *et al.* (2005). The genome sequence of *Xanthomonas oryzae* pathovar  
570 *oryzae* KACC10331, the bacterial blight pathogen of rice. *Nucleic acids research* 33, 577-586.  
571 Li, J.Y., Wang, J., and Zeigler, R.S. (2014). The 3,000 rice genomes project: new  
572 opportunities and challenges for future rice research. *GigaScience* 3, 8.  
573 Mew, T.W., Alvarez, A.M., Leach, J.E., and Swings, J. (1993). Focus on Bacterial-Blight of  
574 Rice. *Plant Disease* 77, 5-12.  
575 Mukherjee, S., and Kearns, D.B. (2014). The structure and regulation of flagella in *Bacillus*  
576 *subtilis*. *Annual review of genetics* 48, 319-340.  
577 Oliva, R., Ji, C., Atienza-Grande, G., Huguet-Tapia, J.C., Perez-Quintero, A., Li, T., Eom, J.S.,  
578 Li, C., Nguyen, H., Liu, B., *et al.* (2019). Broad-spectrum resistance to bacterial blight in rice  
579 using genome editing. *Nature biotechnology* 37, 1344-1350.  
580 Quibod, I.L., Atieza-Grande, G., Oreiro, E.G., Palmos, D., Nguyen, M.H., Coronejo, S.T.,  
581 Aung, E.E., Nugroho, C., Roman-Reyna, V., Burgos, M.R., *et al.* (2020). The Green  
582 Revolution shaped the population structure of the rice pathogen *Xanthomonas oryzae* pv.  
583 *oryzae*. *The ISME journal* 14, 492-505.  
584 Schubert, O.T., Rost, H.L., Collins, B.C., Rosenberger, G., and Aebersold, R. (2017).  
585 Quantitative proteomics: challenges and opportunities in basic and applied research. *Nature*  
586 *protocols* 12, 1289-1294.  
587 Tsuge, S., Furutani, A., and Ikawa, Y. (2014). Regulatory network of *hrp* gene expression in  
588 *Xanthomonas oryzae* pv. *oryzae*. *J Gen Plant Pathol* 80, 303-313.  
589 Tyanova, S., Temu, T., and Cox, J. (2016a). The MaxQuant computational platform for mass  
590 spectrometry-based shotgun proteomics. *Nature protocols* 11, 2301-2319.  
591 Tyanova, S., Temu, T., Sinitcyn, P., Carlson, A., Hein, M.Y., Geiger, T., Mann, M., and Cox, J.

592 (2016b). The Perseus computational platform for comprehensive analysis of (prote)omics  
593 data. *Nature methods* 13, 731-740.

594 Ullah, J.H., Walsh, T.R., Taylor, I.A., Emery, D.C., Verma, C.S., Gamblin, S.J., and Spencer, J.  
595 (1998). The crystal structure of the L1 metallo-beta-lactamase from *Stenotrophomonas*  
596 *maltophilia* at 1.7 Å resolution. *Journal of molecular biology* 284, 125-136.

597

598

599

600 **Scheme legend**

601

602 **Scheme 1.** Schematic representation of the *in vitro* assay system and combined analysis of

603 the time-resolved transcriptome and proteome using RNA-Seq and LC-MS/MS

604

605

606 **Figure legends**

607

608 **Figure 1. Time-supervised hierarchical clustering of duplicate pathogenicity-activated**  
609 **proteome datasets.** The heatmap (left) of genes clustered based on the similarities in the  
610 protein expression pattern over time is presented for duplicate samples of pathogenicity-  
611 activated and control Xoo cells. Low to high expression is indicated by a change in color  
612 from green to red. Selected cluster profile patterns (right) are presented for the down- (blue  
613 box) and upregulated (red box) genes in the P-activated Xoo cells.

614

615 **Figure 2. Time-resolved protein expression patterns associated with the COG categories.**  
616 Two functional categories of genes (COG) associated with the greatest changes in the protein  
617 level are indicated by red boxes, nine functional COGs associated with moderate changes are  
618 indicated by yellow boxes, and other nine functional COGs associated with minor changes in  
619 the protein level are indicated by blue boxes. The inset for each functional COG indicates the  
620 control (untreated cells). The Y-axis represents the fold change in the protein expression level  
621 in comparison with that at 0 min, and the maximum value on the Y-axis was set as 3. The X-  
622 axis indicates the time from 0 to 120 min. Each line indicates the protein expression level of a  
623 gene. The protein expression level is represented as dotted (from 0 to 30 min) and solid (from  
624 30 to 120 min) lines. Note that in contrast to the transcript data, the proteome data was not  
625 available before 30 min (dotted part).

626

627 **Figure 3. Time-resolved mRNA and protein levels of genes associated with cell motility**  
628 **and inorganic ion transport.** (A) Time-resolved expression of cell motility-related genes.  
629 The mRNA expression levels from RNA-Seq are indicated by dashed red lines. The protein

630 expression levels from LC-MS/MS are indicated by black dashed (from 0 to 30 min) and  
631 solid (from 30 to 120 min) lines. (B) Time-resolved expression of inorganic ion transport-  
632 related genes. The mRNA expression levels from RNA-Seq and protein expression levels  
633 from LC-MS/MS are indicated as in (A). The Y-axis represents the fold change.

634

635 **Figure 4. Gene clusters and time-resolved expression patterns of cell motility-related**  
636 **genes.** (A) Gene clusters of flagellar biosynthesis-related genes (groups I-A and I-B) and  
637 chemotaxis genes (group II). (B) Time-resolved mRNA and protein expression levels of  
638 genes in groups I-A, I-B, and II. The down- and upregulation peaks are shown in green and  
639 red, respectively. The yellow and grey ovals indicate unaltered and undetected expression  
640 levels. The thin-bordered oval (at 5, 10, 15, and 45 min) for the proteome data is to ensure  
641 consistency with the pictorial format of RNA-Seq data. The dotted arrows and ovals indicate  
642 genes that are not directly related to flagellar biosynthesis and chemotaxis. Time is expressed  
643 in min.

644

645 **Figure 5. Time-resolved mRNA and protein levels of iron transport-related genes.** (A)  
646 Time-resolved mRNA (red) and protein (black) expression levels of *FecA* and *CirA* genes. (B)  
647 Time-resolved mRNA (red) and protein (black) expression level of *IroN* genes. The Y-axis  
648 represents  $\log_2(\text{fold-change})$ .

649

650 **Figure 6. Time-resolved mRNA and protein expression and protein secretion of genes**  
651 **coding for effector molecules.** (A) The mRNA (red) and protein (black) expression levels of  
652 *XoAvrBs2* gene (above) and dot blots of *XoAvrBs2* protein in *Xoo* cells and culture medium  
653 (below). (B) The mRNA (red) and protein (black) expression levels of *XoAvrBs3* gene (above)

654 and dot blots of XoAvrBs3 protein in Xoo cells and culture medium (below). NC, negative

655 control; PC, positive control

656

657



## 658 **Supplementary data**

659

### 660 **Supplementary figure legends**

661

#### 662 **Figure S1. Detailed analysis of the proteome data of pathogenicity-activated Xoo cells (A)**

663 Number of proteins identified from the high-resolution mass spectrometry-based quantitative  
664 proteomic analysis and (B) coverage percentage of the protein sequence of the identified  
665 proteins (median sequence coverage was ~24%). (C) Number of identified peptides and  
666 peptide-spectrum matches. (D) Quantile normalization box plot. (E) Multi-scatter plot for  
667 analyzing the correlations between samples.

668

#### 669 **Figure S2. Comparative analysis of the proteome of the samples (A) Quantile**

670 normalization box plot. The quantitative proteomic values were normalized using quantile  
671 normalization. (B) Multi-scatter plot for analyzing the correlation between samples. Pairwise  
672 comparisons of protein expression levels in all samples are presented as a multi-scatter plot.  
673 Pearson's correlation coefficients of 0.98-0.99 were obtained. (C) Principal component  
674 analysis of Xoo proteins revealed close relationships among the proteomes of all controls and  
675 changes in proteome concentrations upon RLX treatment.

676

#### 677 **Figure S3. Analysis and comparison of gene expression patterns in the datasets. The**

678 STRING maps (Benjamin-Hochberg at FDR 0.05) of selected cluster profile patterns with (A)  
679 down- (blue box) and (B) upregulated (red box) genes are shown.

680

681 **Figure S4. Comparison of time-resolved mRNA and protein levels of cell motility-**  
682 **related genes.** (A) Time-resolved mRNA levels of flagellar biosynthesis and chemotaxis-  
683 related genes for pathogenicity-activated Xoo cells. All genes in groups I-A, I-B, and II  
684 exhibited the lowest expression level at 5 min and the highest expression level at 30 min. (B)  
685 Time-resolved protein levels of flagellar biosynthesis and chemotaxis-related genes in  
686 pathogenicity-activated Xoo cells. Genes in groups I-A and I-B exhibited the highest  
687 expression level at 30 min, whereas those in group II exhibited the highest expression at 90  
688 min.

689

690 **Figure S5. Time-resolved mRNA and protein expression of iron uptake-related genes.**  
691 Time-resolved mRNA (red) and protein (black) expression levels of iron uptake-related genes  
692 (A) *FecA* and (B) *CirA*. The Y-axis represents  $\log_2$ (fold change).

693

694 **Figure S6. Gene cluster and time-resolved mRNA and protein expression levels of**  
695 **phosphate uptake-related genes.** (A) Gene cluster of the phosphate uptake regulation genes  
696 (*OprO-PhoX-PstSCAB-PhoU*). (B) Time-resolved mRNA and protein expression levels of  
697 phosphate uptake-related genes *OprO*, *PhoX*, *PstSCAB*, and *PhoU*. The line colors  
698 correspond to those of the arrows in (A).

699

700 **Figure S7. Gene clusters of cell motility-related genes in *E. coli* and Xoo and time-**  
701 **resolved mRNA and protein expressions of Xoo genes.** Gene cluster of cell motility-related  
702 genes of (A) *E. coli* and (B) Xoo. (C) Time-resolved mRNA and protein expression of cell  
703 motility-related genes in Xoo. The cell motility-related genes in *E. coli* are classified as class  
704 I (red), II (yellow), III (blue), and II+III (green). The ortholog genes in Xoo are indicated

705 using the same color. For the proteome data, \* indicates the expression peak at 30 min; \*\*,  
706 between 30 and 90 min; \*\*\*, at 90 min. The Y-axis represents  $\log_2(\text{fold change})$ .

707

708 **Figure S8. Gene clusters and time-resolved mRNA and protein expressions of iron**

709 **uptake-related genes in Xoo.** (A) Gene cluster of iron uptake-related genes, labelled in blue.

710 (B) Time-resolved mRNA and protein expression levels of iron uptake genes. Low to high

711 expression is indicated by a change in color from blue to red. Black cells indicate undetected

712 expression.

713

714 **Figure S9. Gene clusters and time-resolved mRNA and protein expressions of genes**

715 **coding for effector molecules.** (A) Gene cluster of effector genes, indicated in red. (B) Time-

716 resolved mRNA and protein expressions of effector genes. Genes with available time-

717 resolved proteomic data are labelled with \*. Of the *avrXa7* and *avrXa3* genes, the mRNA

718 levels of only the former were measured, indicated by +. Transposase genes are indicated in

719 blue.

720

721

722 **Supplementary Table legends**

723

724 **Table S1. The raw data of time-resolved expression levels of mRNAs and proteins in the**  
725 **transcriptome and proteome of P-activated and control Xoo cells.** The RPKM values of  
726 mRNAs and TMT intensities of proteins were obtained from independent duplicated  
727 transcriptome and proteome analyses, respectively, representing the expression levels of  
728 mRNAs and proteins of each gene. The gene products that were not identified or measured  
729 are indicated by black cells.

730

731 **Table S2. The list of selected genes with similar protein expression patterns in the time-**  
732 **supervised hierarchical clustering.** The list of genes marked with blue (downregulated) and  
733 red (upregulated) rectangles in Figure 1, which presented distinct synchronized protein  
734 expression patterns. Of the 40 flagellum-related KEGG annotated genes, 21 were included in  
735 the list, of which 20 genes were upregulated and one gene was downregulated in the  
736 proteome.

737

738 **Table S3. The time-resolved fold change in mRNAs and proteins in the transcriptome**  
739 **and proteome of P-activated and control Xoo cells.** The fold change in gene expression  
740 was calculated by dividing the expression level of a gene at a given time point by that at 0  
741 min. Cells are colored based on the expression level; low to high expression is indicated by a  
742 change in color from blue to red, with white indicating a fold change of 1.

743

744 **Table S4. The control-corrected time-resolved fold change in mRNAs and proteins in**  
745 **the transcriptome and proteome.** For accurate comparison of the mRNA and protein  
746 expression levels, the expression level of P-activated Xoo cells at each time point was  
747 corrected by comparing with that of the control cells. The fold change value for the mRNA or  
748 protein levels in P-activated Xoo cells was divided by that of the control cells at the same  
749 time point. The number and percentage of genes exhibiting 20%, 50%, and 200% (2-fold) up-  
750 and downregulation are indicated at the bottom of the table.

751

752 **Table S5. The number of consistently up- and downregulated genes during the entire**  
753 **duration of 120 min.**

754

755 **Table S6. The list of proteins exhibiting 2-fold upregulation at 30 min in the duplicate**  
756 **proteome datasets.**

757

758 **Table S7. The list of proteins downregulated by 50% at 30 min in the duplicate**  
759 **proteome datasets.**

# Scheme 1

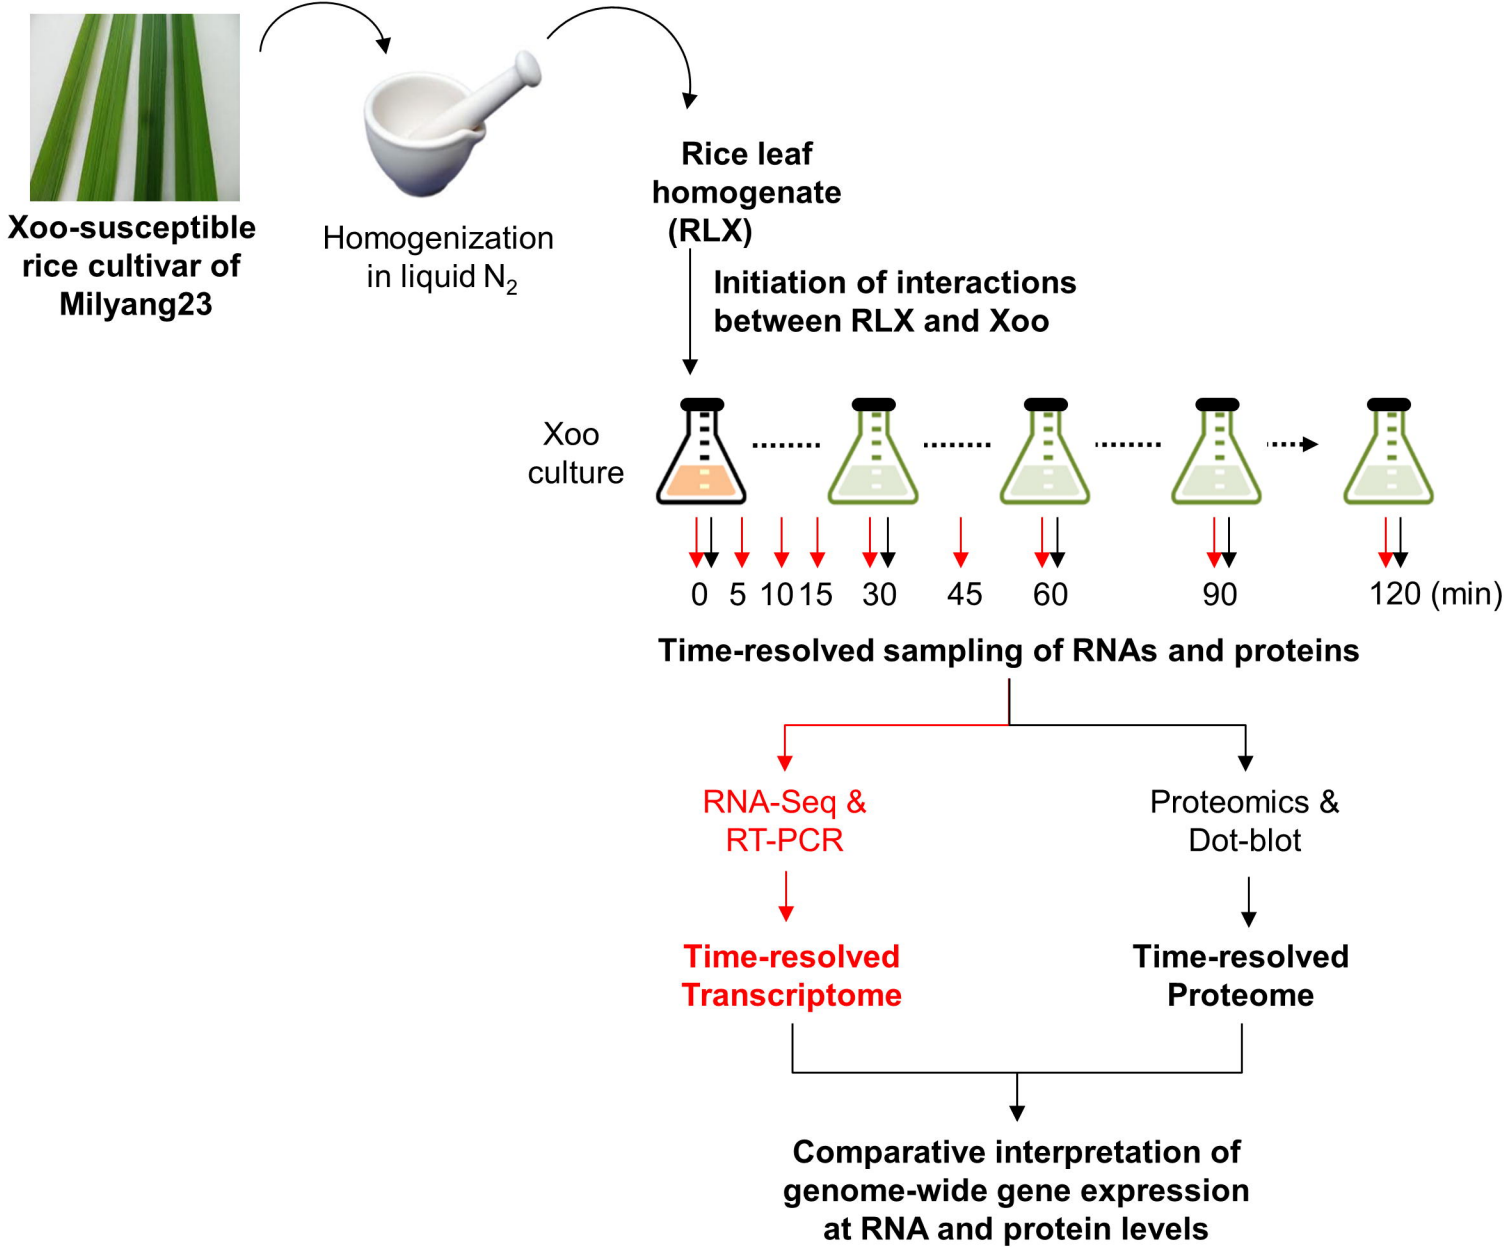

# Figure 1

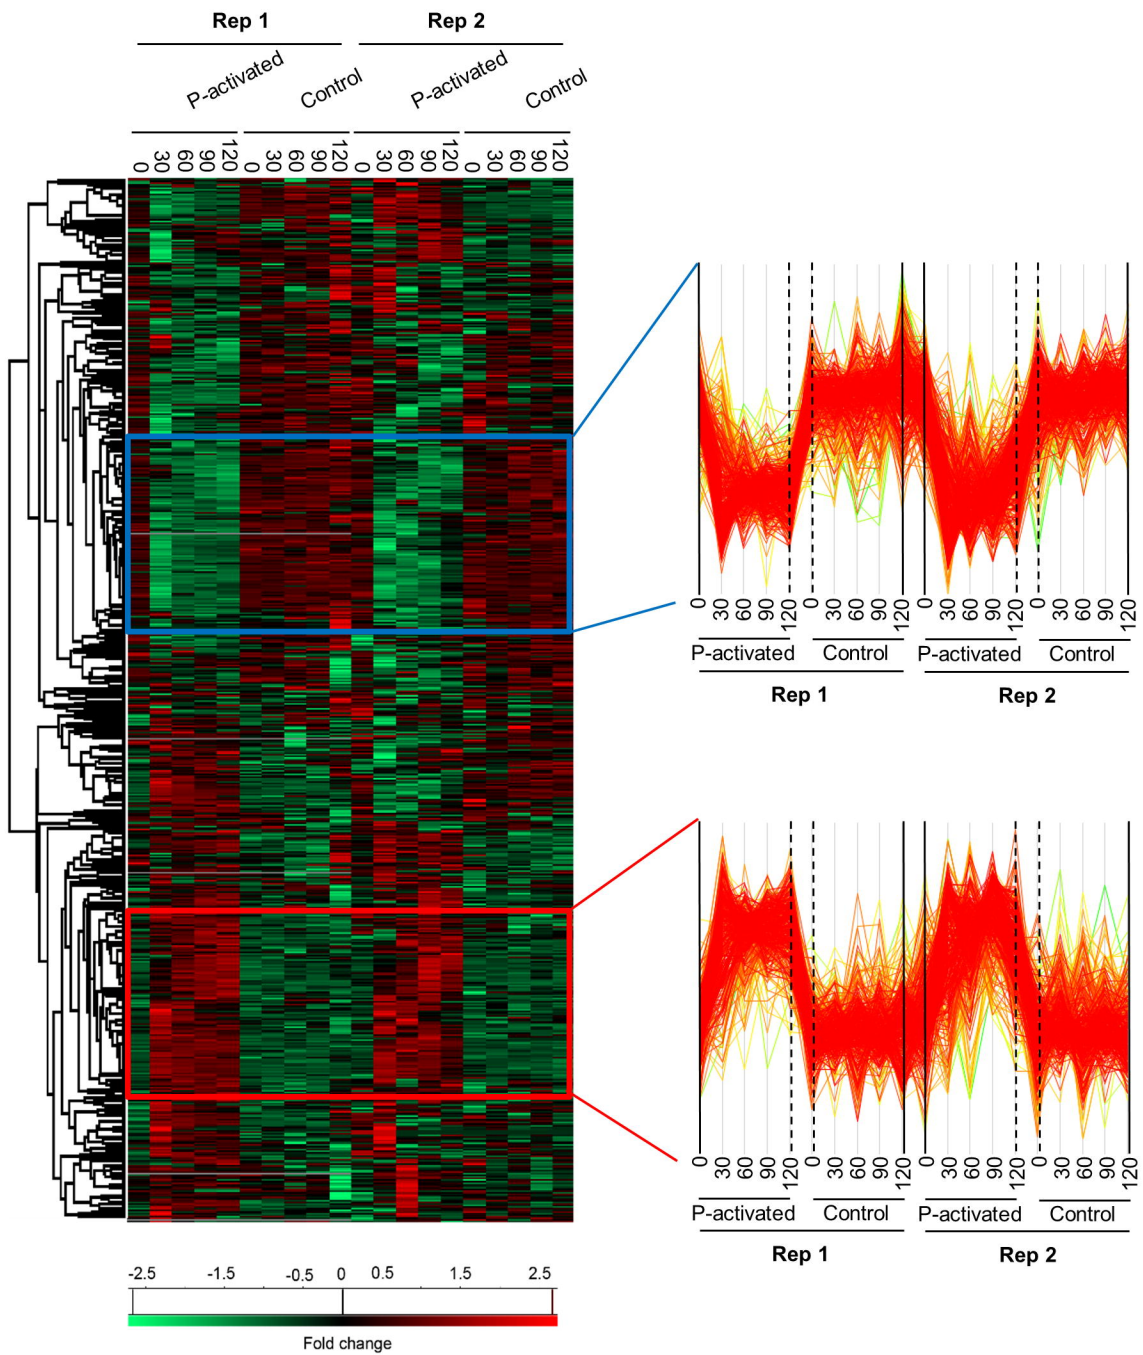

**Figure 2**

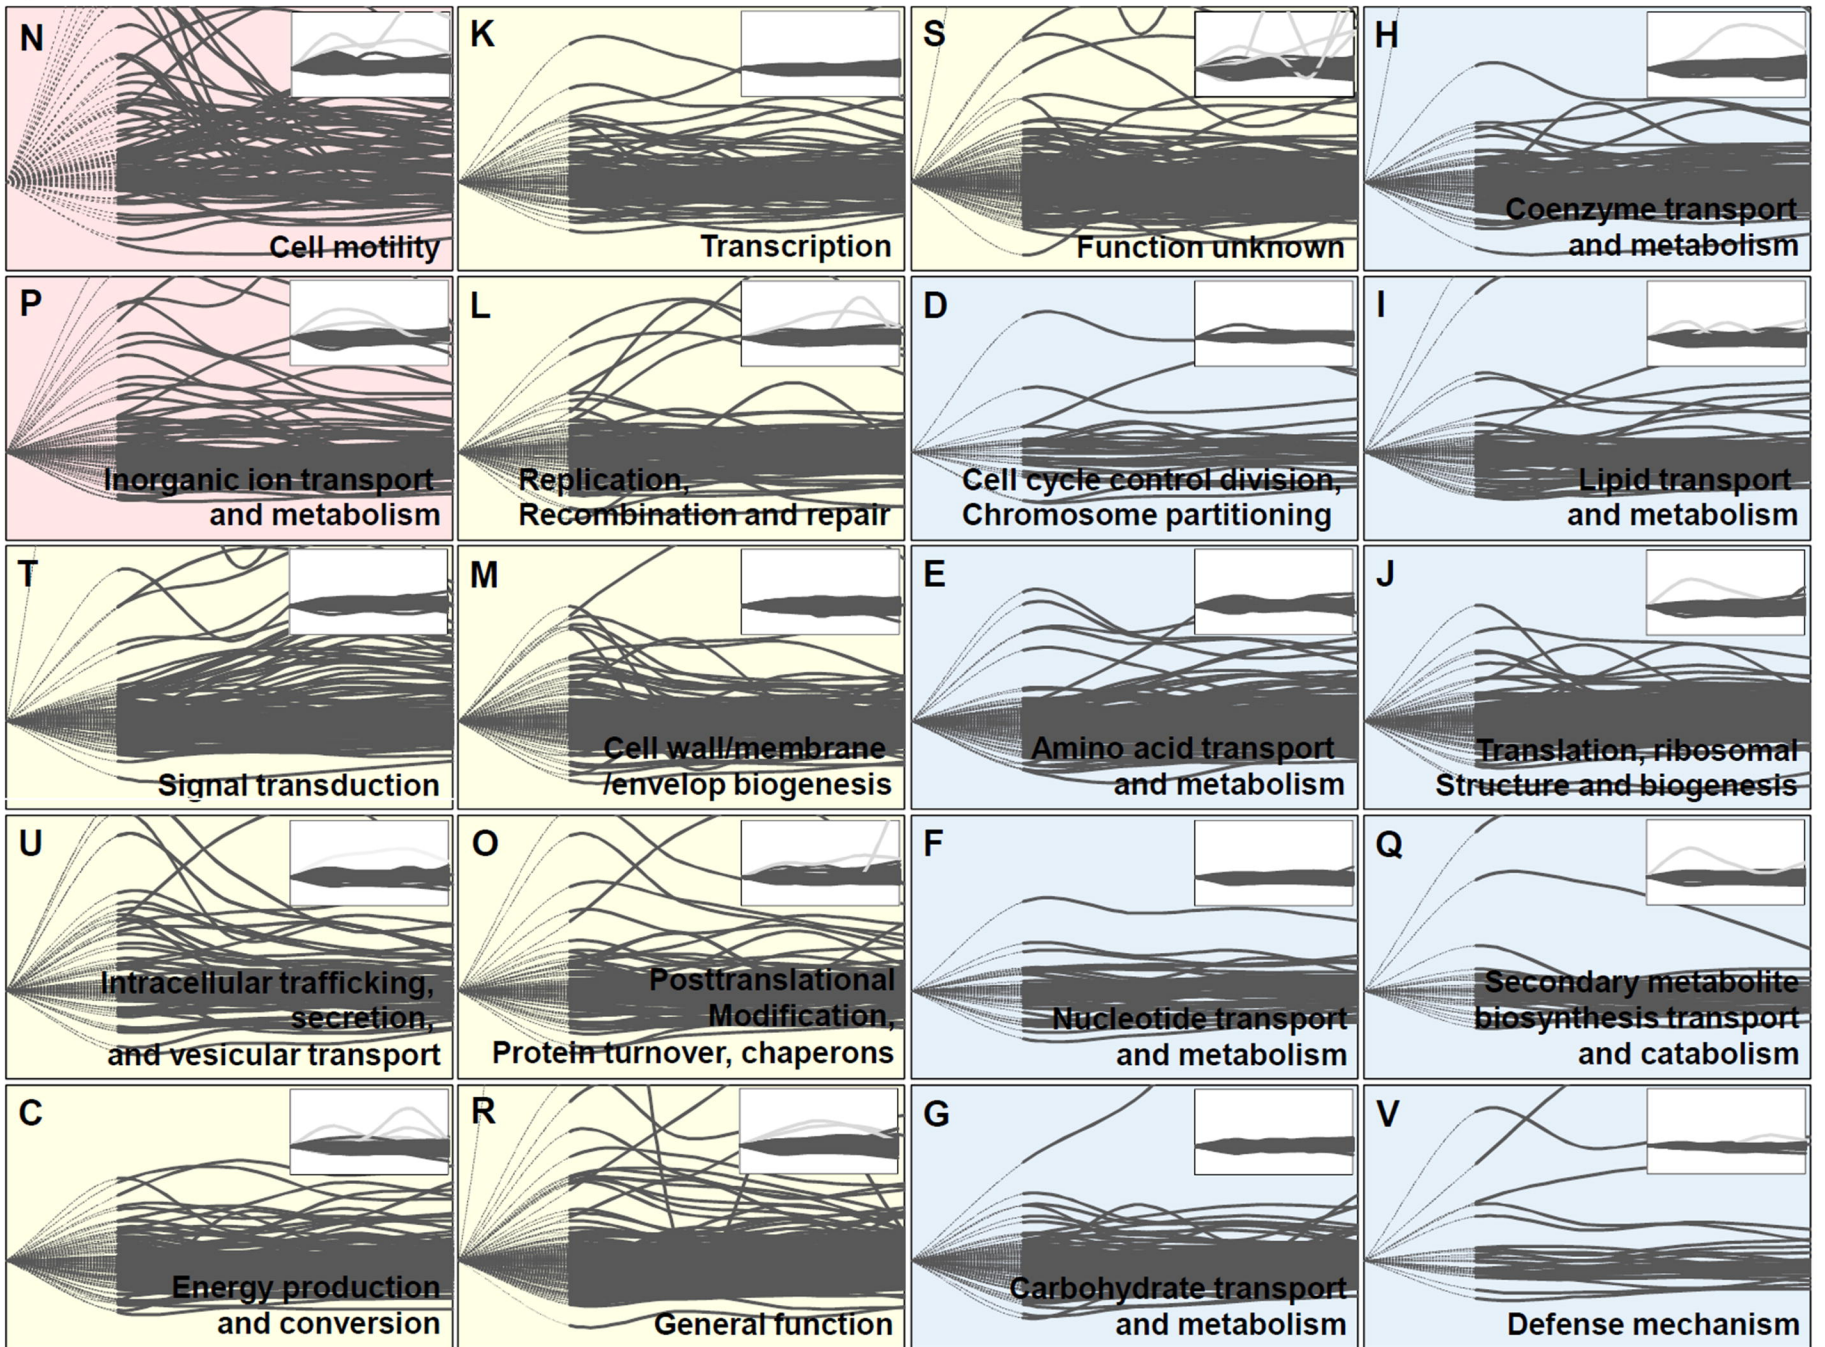



**Figure 3**

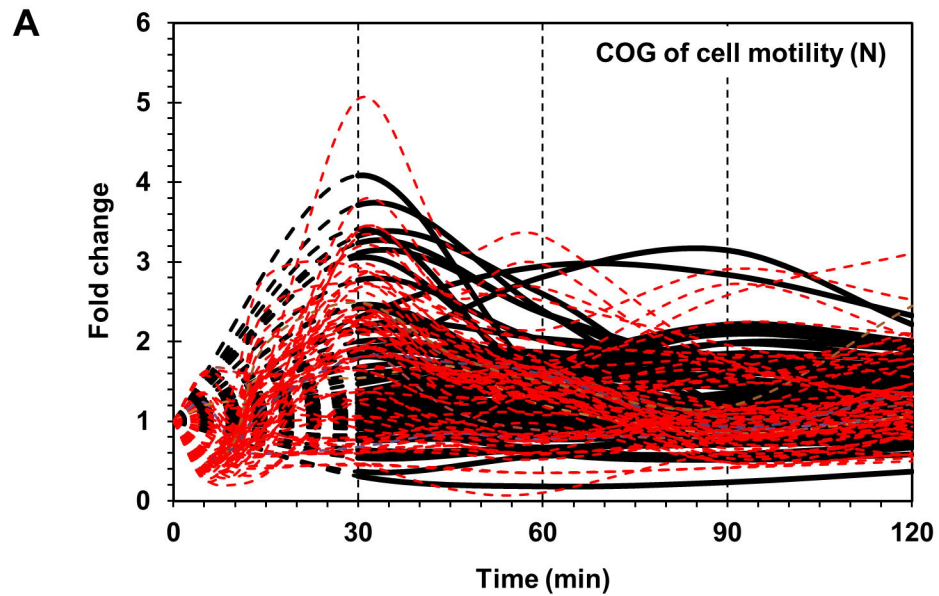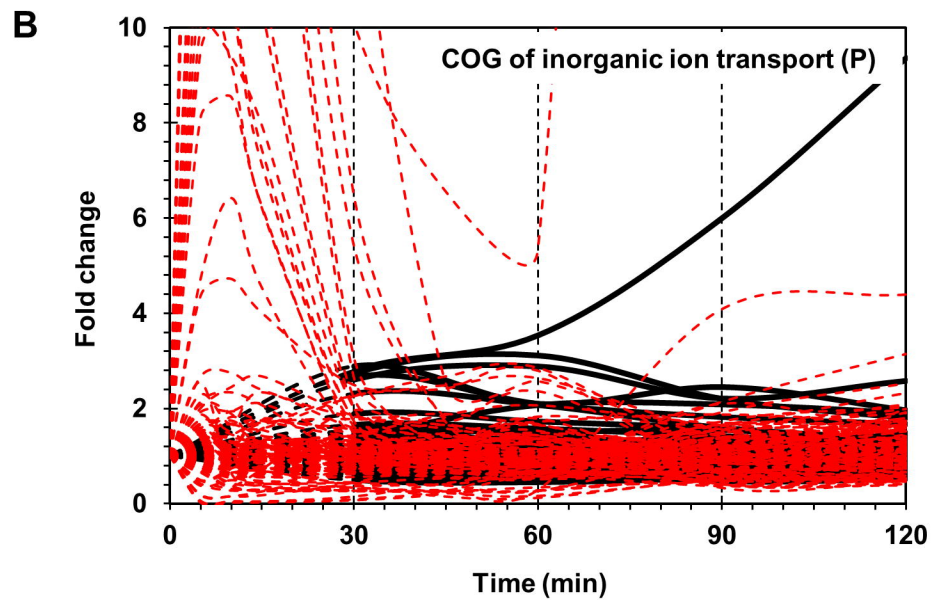



Figure 5

A

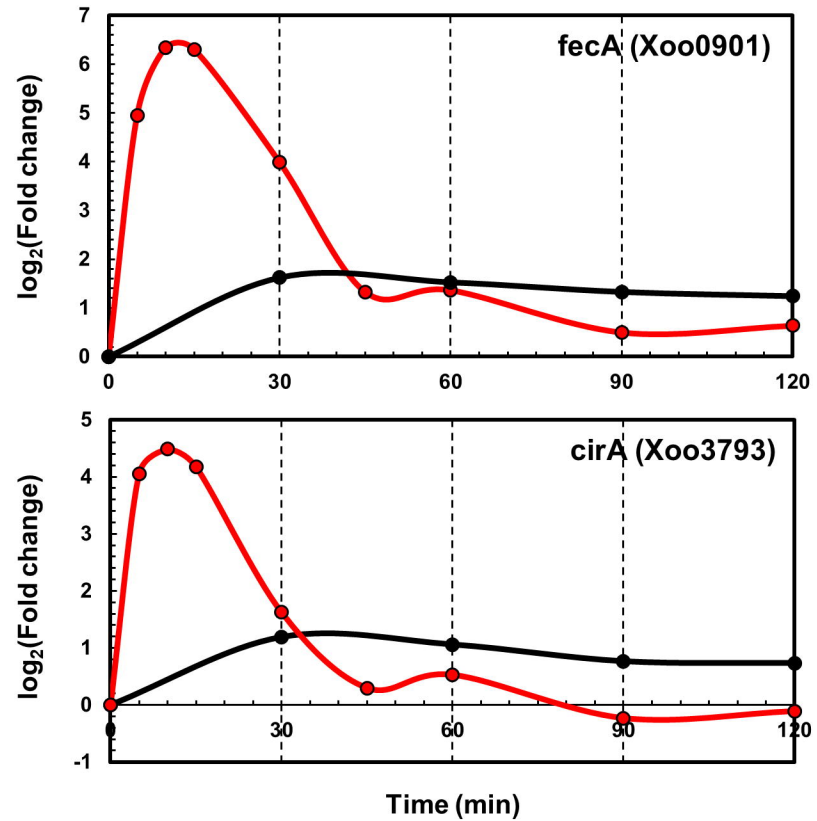

B

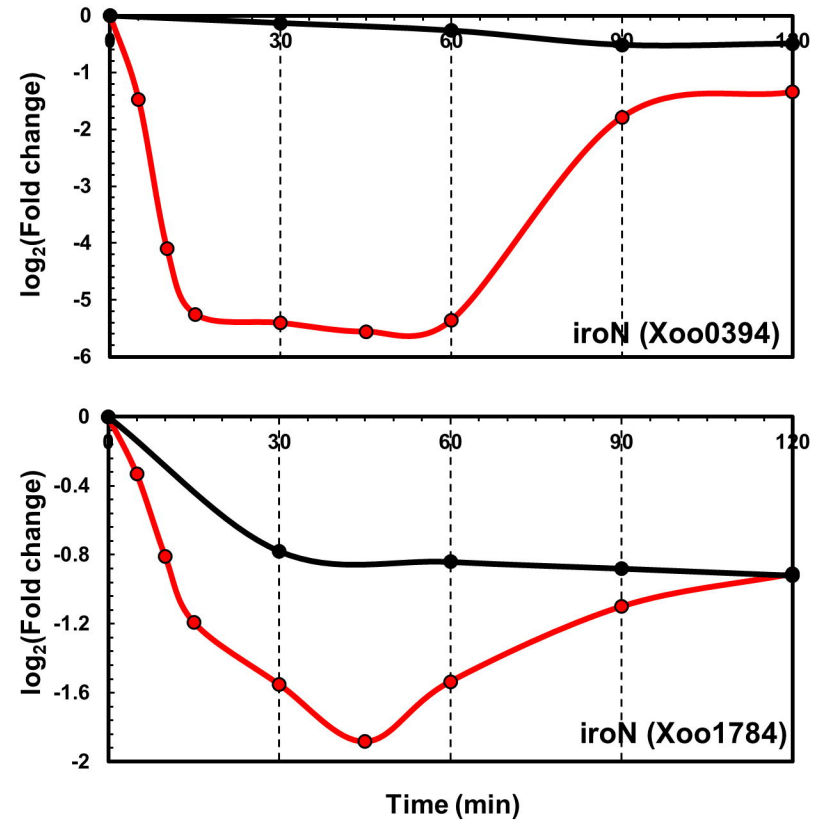

Source: https://biorxiv.org/content/10.1101/2020.10.02.324541v1.full.pdf
